# Supplementary material for: Health services utilisation and responsiveness profiles in Iran: a provincial household study
Source: PubMed Central journal article supplement — Fam Med Community Health. 2019 Jan 24;7(1):e000007. doi: 10.1136/fmch-2018-000007 (PMC6910723; doi:10.1136/fmch-2018-000007), 2019-01-24
Supplement: fmch-2018-000007supp001.pdf [file fmch-2018-000007supp001.pdf]

**Health services utilization and responsiveness**

**Demographics:**

**Gender:** Male  Female

**Family dimension:**.....

**Health insurance:** Social security  Public Health insurance  Rural insurance  Military  other insurances

**Having a child under 5-years:** Yes  NO  , **If yes, the number of child under 5:....**

Did you have any person with following sicknesses?

**Hypertension:** Yes  NO  , **If yes, the number of people:....**

Diabetes: Yes  NO  , **If yes, the number of people:....**

Depression: Yes  NO  , **If yes, the number of people:....**

Injuries: Yes  NO  , **If yes, the number of people:....**

Did you have any person hospitalized in the last year? Yes  NO  , **If yes, the number of people:....**

- 1- When was your or one of your family members last visit to a health care facility or from a health care provider?
  - a. In the last 30 days
  - b. In the last 3 months
  - c. Between 3 months and 12 months ago
  - d. Don't remember
2. In the last time, which of your family member have used health services?
  - a. me
  - b. my child
  - c. my husband/wife
  - d. other people
3. Which of the following health care services, you or your family member have need in the last referral to health system?

|                          |  |                                 |  |                         |  |
|--------------------------|--|---------------------------------|--|-------------------------|--|
| Dentistry                |  | Asthma                          |  | Outpatient surgery      |  |
| Vaccination              |  | Diabetes                        |  | Hospitalization         |  |
| Prenatal care            |  | Thyroid Disease                 |  | Laboratory services     |  |
| Child care               |  | Women diseases                  |  | Rehabilitation Services |  |
| Workplace health control |  | Stroke                          |  | Emergency services      |  |
| Injuries                 |  | Heart failure or hypertension   |  | Imaging services        |  |
| Mental health            |  | Febrile and infectious diseases |  | General outpatient care |  |
| Arthritis                |  | Cancer care                     |  | Kidney disease          |  |
| Allergy care             |  | medicine Digestive              |  | Ophthalmology services  |  |
| Internal medicine        |  | Dermatology services            |  | Otorhinolaryngology-ENT |  |

4. In the last time, you have need health services, could you able to receive the care?
- Yes
  - No
5. If no, which of the following were the main reasons? (You can select two main reasons)

| N | Barrier                                                                          | Yes | No |
|---|----------------------------------------------------------------------------------|-----|----|
| 1 | I could not cover the services costs.                                            |     |    |
| 2 | The health facility was far from my home.                                        |     |    |
| 3 | Medical equipment/ drugs were not enough in the health facility I have referred. |     |    |
| 4 | I was unsure about health providers' skill.                                      |     |    |
| 5 | I have a pervious bad/imperfect treatment experience.                            |     |    |
| 6 | I don't know where to go.                                                        |     |    |
| 7 | My problem was resolved.                                                         |     |    |

6. In the last time, you or your family member, referred to each of following health facilities to receive health services?

- Hospital
- Outpatient ward
- Homecare
- Public clinic
- Community health center
- Health home (Primary Health Center)
- Maternity facilities
- Private clinic
- Traditional Medicine
- Pharmacy

7. In the last time, did you get drug prescription?

- Yes
- No

8. How much did you get the prescribed drugs?

- All of them
- Some of them
- None

9. Why you were not able to get all of the prescribed drugs?

- High cost of them
- I could not find the drugs
- I did not agree that all of them were useful
- I was forward to be well
- I have some of them in home stock

10. Overly, how was you or your family member, satisfied with the health services, in the last time?

- Completely satisfied
- Rarely satisfied
- Dissatisfied
- Completely dissatisfied

11. How much did you paid for the health services, in the last time? (Complete the table, please)

| N | Services | Total cost | Out of pocket |
|---|----------|------------|---------------|
|---|----------|------------|---------------|

|   |                      |  |  |
|---|----------------------|--|--|
| 1 | Visit a doctor       |  |  |
| 2 | Drug                 |  |  |
| 3 | Paramedical services |  |  |
| 4 | Transportation       |  |  |
| 5 | Others               |  |  |

12. How you rank services quality that you have received in the last time?

- a. Very good
- b. Good
- c. Average
- d. Bad
- e. Very bad

13. What was the result of the last health services, you or your family member, have used?

- a. I got well, completely
- b. I got well, rather
- c. I experienced no change
- d. I got worsen
- e. I got worse off

14. How do you assess the feasibility of receiving following health services at home?

| N |                   | Completely feasible | Rare feasibility | Difficult | It is not feasible | Don't know |
|---|-------------------|---------------------|------------------|-----------|--------------------|------------|
| 1 | Visit by a doctor |                     |                  |           |                    |            |
| 2 | Nursing services  |                     |                  |           |                    |            |
| 3 | Blood sampling    |                     |                  |           |                    |            |
| 4 | Injection         |                     |                  |           |                    |            |
| 5 | Rehabilitation    |                     |                  |           |                    |            |

15. If it is not possible, what is the reason?

- a. Home care are not provided in my residency region
- b. It is very costly
- c. Home care services are not confident
- d. Others (Please specify) .....

16. Please rank the following items about your last health service utilization.

| N | Items                                                                       | Very good | Good | Average | Bad | Very bad |
|---|-----------------------------------------------------------------------------|-----------|------|---------|-----|----------|
| 1 | Health services were delivered promptly                                     |           |      |         |     |          |
| 2 | Health services were delivered with dignity                                 |           |      |         |     |          |
| 3 | Giving information on your health and also services by the health providers |           |      |         |     |          |
| 4 | Your Active Participation In Decision Making                                |           |      |         |     |          |
| 5 | Your Information Confidentiality                                            |           |      |         |     |          |
| 6 | Your Autonomy In Selecting Health Provider                                  |           |      |         |     |          |
| 7 | Cleanliness and adornment of health facility amenities                      |           |      |         |     |          |
| 8 | Appropriate physical space and access to the health facility                |           |      |         |     |          |
